# Supplementary material
Source: publisher site journal article supplement (https://static.cambridge.org/content/id/urn:cambridge.org:id:article:S1047951120002759/resource/name/S1047951120002759supp001.docx)
Supplement: Supplementary file 1 [file S1047951120002759supp001.docx]

**Appendix A:**

**Parent or Legal Guardian Telephone Interview Guide**

The questions below are the basic questions that we will address during the phone interviews. The exact questions may change depending on the flow of the interview or comments from the interviewee:

The purpose of this interview is to better understand your transitions to home with your child and how prepared you felt with this transition.

I wanted to start by talking about the experience in the Cardiac Care Unit (CCU) and how it may or may not have prepared you to go home.

1. In general, how prepared did you feel about going home with your child the day of discharge?
2. What kinds of things happened while you were in the CCU that helped you feel more comfortable about going home with your child?
   1. Who were the people most involved in these activities?
3. What kinds of things did not happen but might have helped you feel more comfortable about going home with your child?
   1. Which people do you think could have been helpful in supporting these activities?
4. Thinking about your child’s last few days in the hospital before going home, what kind of learning tools were used to prepare you to care for your child at home?
   1. Prompt with specifics if needed: examples could be instructional videos, discharge instructions, handouts, or hands on training)
5. What questions do you wish the care team had helped answer before your child was discharged?
6. When did you get your discharge teaching?
7. How comfortable do you feel about scheduling follow-up appointments?
   1. Before you were discharged to home, were your questions answered about where your follow-up appointments are located?
8. What medications is your child on?
   1. Why is your child on [fill in the blank] medication? (The interviewer will ask about each cardiac-specific medication)
9. How comfortable were you with giving your child his or her medication?
   1. Who would you call if you had questions or issues with your child’s medications?
   2. Prompt if patient had equipment for home: How comfortable were you with the equipment that was sent to your home (i.e. pulse ox, feeding pump, or NG supplies)
10. Describe your comfort with managing your child’s pain.
    1. Who would you call if you were having concerns that your child’s pain is not being managed well at home?
11. Describe your comfort with your child’s incision care.
    1. Prompt if they did not give specific knowledge: what do you know about your child’s incision care?
    2. What are you looking for when monitoring your child’s incision?
    3. Who would you call if there were problems with your child’s incision site?
       1. When would you call if you were concerned about your child’s incision site?
12. What kinds of signs and symptoms would you suspect if your child were ill or had an infection?
    1. Who would you call if you had concerns that your child had an infection?
13. Who would you call in an emergency?
14. If you were designing education materials for parents to prepare them for taking care of their child at home, what would they look like? What would you suggest?
    1. Prompt if needed e.g. from handouts, videos, one-on-one discussions
15. We are trying to think of ways to improve the education for the discharge teaching process. One approach could be to use a mobile application for your cellphone. What are your thoughts about that?
    1. What kinds of things might have been useful to you or other parents if we were to design such an app?
    2. Which would you prefer the most: handouts, videos, or mobile app?
    3. Other suggestions that weren’t mentioned?
